# Supplementary material for: Downregulation of Sirt6 by CD38 promotes cell senescence and aging
Source: publisher site journal article supplement (doi:10.18632/aging.204425), 2022-12-06
Supplement: Supplementary file [file aging-v14i23-204425-supplementary-material-SD2.pdf]

## SUPPLEMENTARY TABLE

Supplementary Table 1. Primer sequences for target genes.

| Target gene          | Sequence of primer                                                     |
|----------------------|------------------------------------------------------------------------|
| SIRT1 Rat            | F: 5'-TGACCTCCTCATTGTTATTGGG-3'<br>R: 5'-GGCATACTCGCCACCTAACCT-3'      |
| SIRT3 Rat            | F: 5'-TCTGGTATCCCTGCCTCAAAG<br>R: 5'-CACGTCAGCCCGTATGTCTTC             |
| SIRT6 Rat            | F: 5'-TGGGTCTGAATATCTCGGGCA-3'<br>R: 5'-CAGTGTGGTGATGTCGGTG-3'         |
| CD38 Rat             | F: 5'-TGGAGCAAGTCCAAACACCTGGC-3'<br>R: 5'-CTGGGGTCTCCACACCACCTGA-3'    |
| $\beta$ -actin Rat   | F: 5'-CCCATCTATGAGGGTTACGC-3'<br>R: 5'-TTTAATGTCACGCACGATTC-3'         |
| HK2 Rat              | F: 5'-AGACCAGAGCATCCTCCTCAAGTG -3'<br>R: 5'-TCATTCACCACGGCAACCACATC-3' |
| TERT Rat             | F: 5'-TCCTCTGTGCCCCGCTGGTTAC-3'<br>R: 5'-AGCCTCTTCGTACCTCGTGATGG-3'    |
| SIRT6 Mouse          | F: 5'-GGCTACGTGGATGAGGTGAT-3'<br>R: 5'-GGCTCAGCCTTGAGTGCTAC-3'         |
| CD38 Mouse           | F: 5'-GCCATTTACAAAAACAGCACC-3'<br>R: 5'-GCACAATCATCTTCAGCTCATT-3'      |
| $\beta$ -actin Mouse | F: 5'-TATCGCTGCGCTGGTCGG-3'<br>R: 5'-CCCACGATGGAGGGGAATAC-3'           |

Abbreviations: F: forward primer; R: reverse primer.
